# Supplementary material for: Role of hypothalamic MAPK/ERK signaling and central action of FGF1 in diabetes remission
Source: PubMed Central journal article supplement — iScience. 2021 Aug 4;24(9):102944. doi: 10.1016/j.isci.2021.102944 (PMC8368994; doi:10.1016/j.isci.2021.102944), 2021-08-04
Supplement: mmc1.pdf [file mmc1.pdf]

**Supplemental information**

**Role of hypothalamic MAPK/ERK signaling  
and central action of FGF1 in diabetes remission**

**Jenny M. Brown, Marie A. Bentsen, Dylan M. Rausch, Bao Anh Phan, Danielle Wieck, Huzaifa Wasanwala, Miles E. Matsen, Nikhil Acharya, Nicole E. Richardson, Xin Zhao, Peng Zhai, Anna Secher, Gregory J. Morton, Tune H. Pers, Michael W. Schwartz, and Jarrad M. Scarlett**

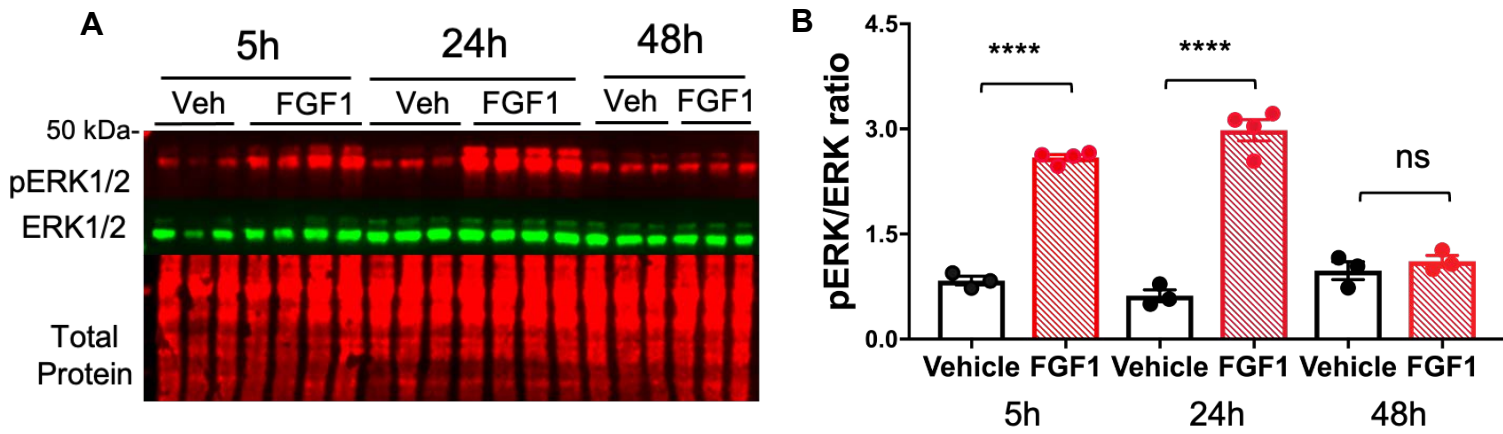

**Supplementary Figure 1- Central Administration of FGF1 Induces Sustained ERK1/2 Signaling in the MBH of db/db mice. (Related to Figure 1)** A) Representative western blot (left panel) of phosphorylated (red) and total ERK1/2 (green) and total protein (red) from mediobasal hypothalamic punches from adult male db/db mice after a single icv injection of either vehicle or FGF1 (3 ug) and quantitative comparison at B) 5 hours (n=3-4/group,  $t=24.48$  df=5  $p=0.0001$ ), 24 hours (n=3-4/group,  $t=12.21$  df=5  $p=0.0001$ ), 48 hours (n=3/group,  $t=-0.0344$ , df=4,  $p=0.2121$ ) after injection. pERK1/2 ratio unpaired Welch two sample t-test (one sided) \*\*\*\* $P<0.0001$ .

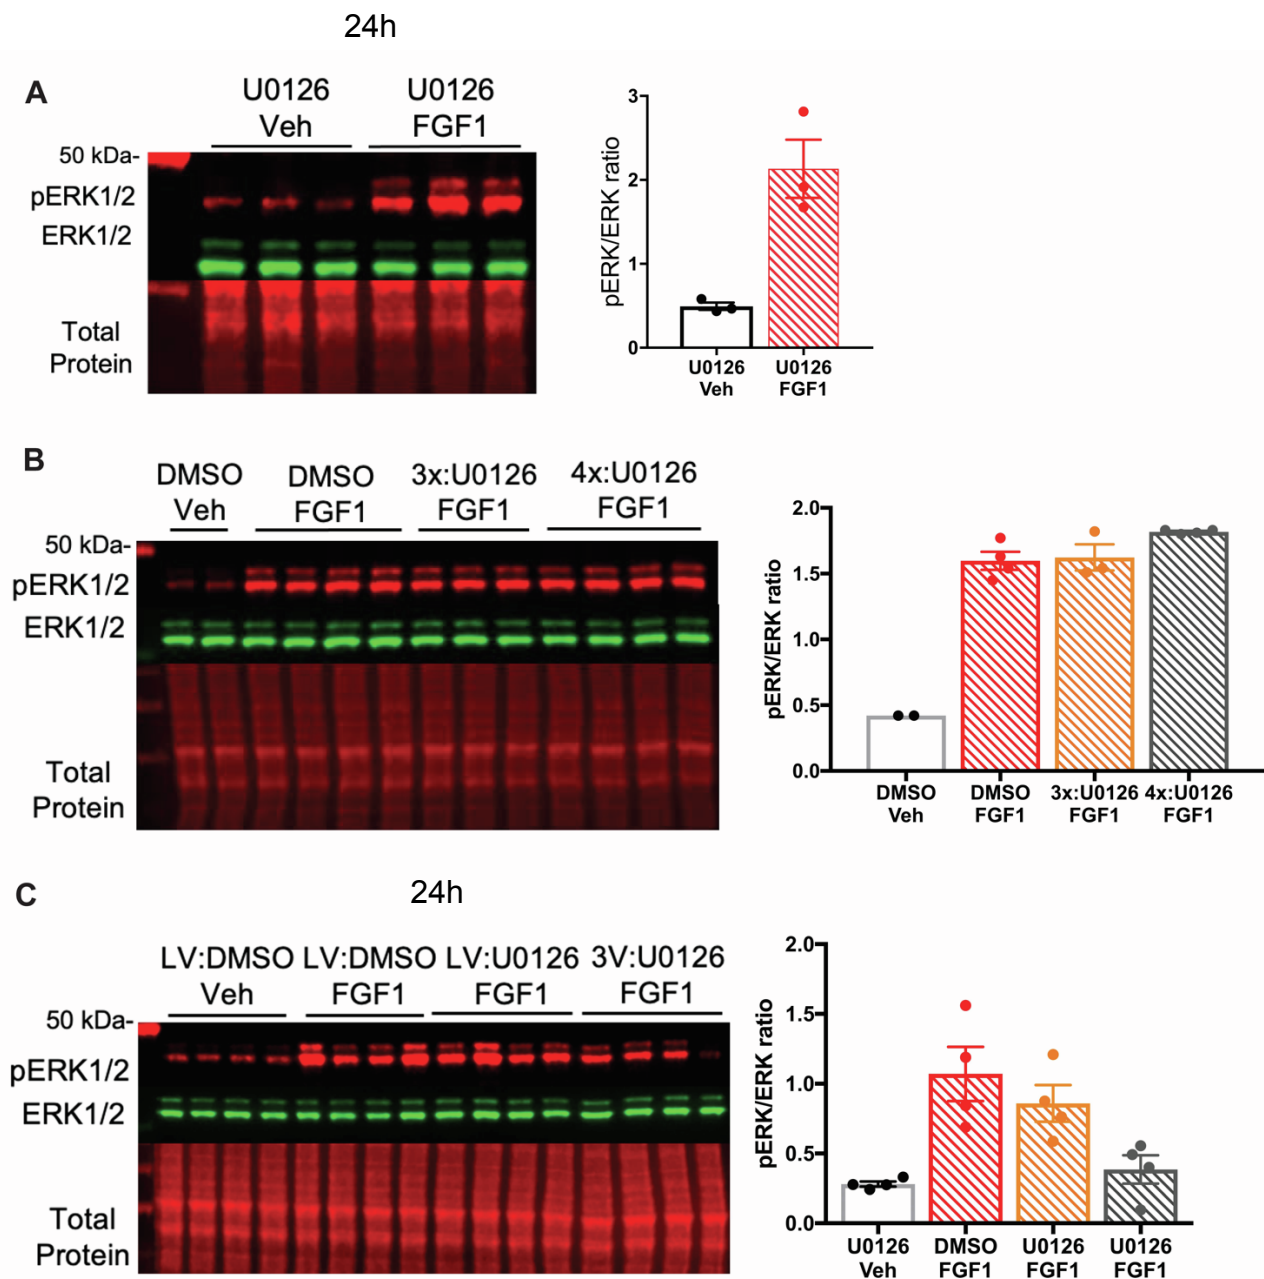

**Supplementary Figure 2- Blockade of Prolonged MAPK/ERK signaling in the MBH induced by central FGF1. (Related to Figure 2)** **A**) Representative western blot (left panel) and quantitative comparison of phosphorylated (red) and total ERK1/2 (green) and total protein (red) (right panel) from mediobasal hypothalamic punches from adult male C57Bl6J mice 24 hours after a icv injection of an inhibitor of MAPK signaling U0126 (5  $\mu$ g) followed by vehicle or FGF1 into the lateral ventricle and **B**) 24 hours after 3 and 4 repeated injections of U0126 (5  $\mu$ g) 3h apart after a single icv injection of either vehicle or FGF1. **C**) a single icv injection of FGF1 into the lateral ventricle (LV) or 3rd ventricle (3V) followed by continuous infusion via osmotic pump of 30mM 1ul/hour U0126 or DMSO for 24 hours.
